# Supplementary material for: Digital Interventions for Recreational Cannabis Use Among Young Adults: Systematic Review, Meta-Analysis, and Behavior Change Technique Analysis of Randomized Controlled Studies
Source: PubMed Central journal article supplement (PMC11063887; doi:10.2196/55031), 2024-04-17
Supplement: jmir_v26i1e55031_app2.pdf [file jmir_v26i1e55031_app2.pdf]

# LITERATURE SEARCH REPORT

---

**Authors:** Côté, José; Chicoine, Gabrielle; Vinette, Billy; Auger, Patricia; Rouleau, Geneviève; Fontaine, Guillaume; Jutras-Aswad, Didier.  
**Review title:** Digital interventions for nonmedical cannabis use among young adults: a systematic review, meta-analysis, and behavior change technique analysis  
**Date:** February 13, 2023

---

This report is based on the PRISMA-S recommendations for reporting systematic reviews<sup>1</sup>.

## Contents

|      |                                                                                               |   |
|------|-----------------------------------------------------------------------------------------------|---|
| 1.   | Methodology.....                                                                              | 2 |
| 2.   | Databases and search strategies .....                                                         | 3 |
| 2.1. | CINAHL Complete (Ebsco).....                                                                  | 3 |
| 2.2. | Cochrane Database of Systematic Reviews and Central Register of Controlled Trials (Ovid)..... | 4 |
| 2.3. | Embase (Ovid) <1974 to 2023 February 11 > .....                                               | 5 |
| 2.4. | Ovid MEDLINE(R) ALL <1946 to February 10, 2023> .....                                         | 6 |
| 2.5. | PsycINFO (Ovid) <1806 to January Week 5 2023> .....                                           | 7 |
| 2.6. | PubMed <Oct 6 to Oct 13> .....                                                                | 8 |
| 3.   | Results of the search strategy update (February 13, 2023), for each database .....            | 9 |

---

<sup>1</sup> Rethlefsen ML, Kirtley S, Waffenschmidt S, Ayala AP, Moher D, Page MJ, et al. PRISMA-S: an extension to the PRISMA Statement for Reporting Literature Searches in Systematic Reviews. *Syst Rev.* 2021;10(1):39. DOI: <https://dx.doi.org/10.1186/s13645-020-01542-z>.

# 1. Methodology

## Information sources and methods

The following electronic databases were searched: MEDLINE (via Ovid; via PubMed for the last 7 days only); Embase (via Ovid); CINAHL Complete (via Ebsco), Cochrane Database of Systematic reviews (via Ovid), Cochrane Central Register of Controlled Trials (via Ovid) and PsycInfo (via Ovid).

Reference lists of included articles were manually screened to identify additional studies.

## Search strategies

Search strategies were designed by a librarian (BN).

The comprehensive literature search was initially run on March 18, 2020 and then rerun on October 13<sup>th</sup>, 2021 and then on February 13<sup>th</sup>, 2023.

The Medline search strategy was peer reviewed by another senior information specialist prior to execution and then applied to all databases, with modifications to search terms as necessary. No language limits were applied.

## Managing records

A total of 7822 citations were retrieved from the 7 databases initially, and 2805 and 2605 for the updates in 2021 and 2023, respectively.

Duplicates were removed in EndNote by the librarian (BN).

After duplicate removal, 4204 remained to be screened on March 18, 2020 and 1316 for the update in 2021 and 1086 in 2023.

## 2. Databases and search strategies

### 2.1. CINAHL Complete (Ebsco)

|     |                                                                                                                                                                                                                                                                                                                                                                                                                                                                                                                                                                                                                                                                                                                                                                                                                                                                                                                                                                                                                                                                                                                                                                                                                                                                                                                                                                                                                                                                                                                                                                                                                                                                          |         |
|-----|--------------------------------------------------------------------------------------------------------------------------------------------------------------------------------------------------------------------------------------------------------------------------------------------------------------------------------------------------------------------------------------------------------------------------------------------------------------------------------------------------------------------------------------------------------------------------------------------------------------------------------------------------------------------------------------------------------------------------------------------------------------------------------------------------------------------------------------------------------------------------------------------------------------------------------------------------------------------------------------------------------------------------------------------------------------------------------------------------------------------------------------------------------------------------------------------------------------------------------------------------------------------------------------------------------------------------------------------------------------------------------------------------------------------------------------------------------------------------------------------------------------------------------------------------------------------------------------------------------------------------------------------------------------------------|---------|
| S1  | (MH "Cannabis")                                                                                                                                                                                                                                                                                                                                                                                                                                                                                                                                                                                                                                                                                                                                                                                                                                                                                                                                                                                                                                                                                                                                                                                                                                                                                                                                                                                                                                                                                                                                                                                                                                                          | 11,550  |
| S2  | TI ( Cannabi* or Marihuana* or Marijuana* or Hemp or Hemp* or Ganja or Ganjas or Hashish or Hashish* or Bhang or Bhangs or Smoking Blunt* ) OR AB ( Cannabi* or Marihuana* or Marijuana* or Hemp or Hemp* or Ganja or Ganjas or Hashish or Hashish* or Bhang or Bhangs or Smoking Blunt* )                                                                                                                                                                                                                                                                                                                                                                                                                                                                                                                                                                                                                                                                                                                                                                                                                                                                                                                                                                                                                                                                                                                                                                                                                                                                                                                                                                               | 22,708  |
| S3  | TI ( weed* N3 (smok* or use* or using or abus* or dependen* or disorder* ) ) OR AB ( weed* N3 (smok* or use* or using or abus* or dependen* or disorder* ) )                                                                                                                                                                                                                                                                                                                                                                                                                                                                                                                                                                                                                                                                                                                                                                                                                                                                                                                                                                                                                                                                                                                                                                                                                                                                                                                                                                                                                                                                                                             | 55      |
| S4  | S1 OR S2 OR S3                                                                                                                                                                                                                                                                                                                                                                                                                                                                                                                                                                                                                                                                                                                                                                                                                                                                                                                                                                                                                                                                                                                                                                                                                                                                                                                                                                                                                                                                                                                                                                                                                                                           | 25,263  |
| S5  | (MH "Internet")                                                                                                                                                                                                                                                                                                                                                                                                                                                                                                                                                                                                                                                                                                                                                                                                                                                                                                                                                                                                                                                                                                                                                                                                                                                                                                                                                                                                                                                                                                                                                                                                                                                          | 54,646  |
| S6  | (MH "Cellular Phone") OR (MH "Text Messaging") OR (MH "Smartphone")                                                                                                                                                                                                                                                                                                                                                                                                                                                                                                                                                                                                                                                                                                                                                                                                                                                                                                                                                                                                                                                                                                                                                                                                                                                                                                                                                                                                                                                                                                                                                                                                      | 9,940   |
| S7  | (MH "World Wide Web")                                                                                                                                                                                                                                                                                                                                                                                                                                                                                                                                                                                                                                                                                                                                                                                                                                                                                                                                                                                                                                                                                                                                                                                                                                                                                                                                                                                                                                                                                                                                                                                                                                                    | 78,811  |
| S8  | (MH "Telehealth") OR (MH "Telemedicine")                                                                                                                                                                                                                                                                                                                                                                                                                                                                                                                                                                                                                                                                                                                                                                                                                                                                                                                                                                                                                                                                                                                                                                                                                                                                                                                                                                                                                                                                                                                                                                                                                                 | 28,742  |
| S9  | (MH "Mobile Applications")                                                                                                                                                                                                                                                                                                                                                                                                                                                                                                                                                                                                                                                                                                                                                                                                                                                                                                                                                                                                                                                                                                                                                                                                                                                                                                                                                                                                                                                                                                                                                                                                                                               | 11,814  |
| S10 | (MH "Microcomputers+")                                                                                                                                                                                                                                                                                                                                                                                                                                                                                                                                                                                                                                                                                                                                                                                                                                                                                                                                                                                                                                                                                                                                                                                                                                                                                                                                                                                                                                                                                                                                                                                                                                                   | 11,944  |
| S11 | (MH "Computer Simulation") OR (MH "Augmented Reality") OR (MH "Virtual Reality")                                                                                                                                                                                                                                                                                                                                                                                                                                                                                                                                                                                                                                                                                                                                                                                                                                                                                                                                                                                                                                                                                                                                                                                                                                                                                                                                                                                                                                                                                                                                                                                         | 26,485  |
| S12 | (MH "Online Services")                                                                                                                                                                                                                                                                                                                                                                                                                                                                                                                                                                                                                                                                                                                                                                                                                                                                                                                                                                                                                                                                                                                                                                                                                                                                                                                                                                                                                                                                                                                                                                                                                                                   | 4,911   |
| S13 | (MH "Online Social Networking")                                                                                                                                                                                                                                                                                                                                                                                                                                                                                                                                                                                                                                                                                                                                                                                                                                                                                                                                                                                                                                                                                                                                                                                                                                                                                                                                                                                                                                                                                                                                                                                                                                          | 630     |
| S14 | (MH "Social Media") OR (MH "Facebook") OR (MH "Twitter")                                                                                                                                                                                                                                                                                                                                                                                                                                                                                                                                                                                                                                                                                                                                                                                                                                                                                                                                                                                                                                                                                                                                                                                                                                                                                                                                                                                                                                                                                                                                                                                                                 | 21,931  |
| S15 | TI ( Web or website* or internet or echeckup or smartphone* or ((ios or android or smart or portable or cell) N2 (device* or phone* or system* or platform* or application*)) or mobile or online or on-line or (chat N2 (live or based or messenger* or group* or interface or function* or forum* or transcript* or session* or log or logs or counsel* or bot or bots or support* or room or rooms)) or computer* or mhealth or m-health or ehealth or e-health or app or apps or digital or SMS or messaging or Short Message Service* or texting or ((virtual or augmented) N2 realit*) or Serious gam* or telemedicine or telehealth* or (tele N2 (medicine or health*)) or blog or blogs or blogging or social media* or (wearable N2 device*) or ((electronic or digital) N3 (communicat* or learn* or game* or gaming)) ) OR AB ( Web or website* or internet or echeckup or smartphone* or ((ios or android or smart or portable or cell) N2 (device* or phone* or system* or platform* or application*)) or mobile or online or on-line or (chat N2 (live or based or messenger* or group* or interface or function* or forum* or transcript* or session* or log or logs or counsel* or bot or bots or support* or room or rooms)) or computer* or mhealth or m-health or ehealth or e-health or app or apps or digital or SMS or messaging or Short Message Service* or texting or ((virtual or augmented) N2 realit*) or Serious gam* or telemedicine or telehealth* or (tele N2 (medicine or health*)) or blog or blogs or blogging or social media* or (wearable N2 device*) or ((electronic or digital) N3 (communicat* or learn* or game* or gaming)) ) | 502,381 |
| S16 | S5 OR S6 OR S7 OR S8 OR S9 OR S10 OR S11 OR S12 OR S13 OR S14 OR S15                                                                                                                                                                                                                                                                                                                                                                                                                                                                                                                                                                                                                                                                                                                                                                                                                                                                                                                                                                                                                                                                                                                                                                                                                                                                                                                                                                                                                                                                                                                                                                                                     | 621,683 |
| S17 | S4 AND S16                                                                                                                                                                                                                                                                                                                                                                                                                                                                                                                                                                                                                                                                                                                                                                                                                                                                                                                                                                                                                                                                                                                                                                                                                                                                                                                                                                                                                                                                                                                                                                                                                                                               | 2,218   |
| S18 | TI ( newborn* or new-born* or neonat* or neo-nat* or infan* or child* or adolesc* or paediatr* or pediater* or baby* or babies* or toddler* or kid or kids or boy* or girl* or juvenile* or teen* or youth* or pubescen* or preadolesc* or prepubesc* or preteen or tween )                                                                                                                                                                                                                                                                                                                                                                                                                                                                                                                                                                                                                                                                                                                                                                                                                                                                                                                                                                                                                                                                                                                                                                                                                                                                                                                                                                                              | 687,884 |
| S19 | SO (pediatr* or paediatr*)                                                                                                                                                                                                                                                                                                                                                                                                                                                                                                                                                                                                                                                                                                                                                                                                                                                                                                                                                                                                                                                                                                                                                                                                                                                                                                                                                                                                                                                                                                                                                                                                                                               | 211,156 |
| S20 | S18 OR S19                                                                                                                                                                                                                                                                                                                                                                                                                                                                                                                                                                                                                                                                                                                                                                                                                                                                                                                                                                                                                                                                                                                                                                                                                                                                                                                                                                                                                                                                                                                                                                                                                                                               | 770,308 |
| S21 | S17 NOT S20                                                                                                                                                                                                                                                                                                                                                                                                                                                                                                                                                                                                                                                                                                                                                                                                                                                                                                                                                                                                                                                                                                                                                                                                                                                                                                                                                                                                                                                                                                                                                                                                                                                              | 1,892   |
| S22 | (MH "Students") OR (MH "Students, College")                                                                                                                                                                                                                                                                                                                                                                                                                                                                                                                                                                                                                                                                                                                                                                                                                                                                                                                                                                                                                                                                                                                                                                                                                                                                                                                                                                                                                                                                                                                                                                                                                              | 48,275  |
| S23 | (MH "Students, Graduate+")                                                                                                                                                                                                                                                                                                                                                                                                                                                                                                                                                                                                                                                                                                                                                                                                                                                                                                                                                                                                                                                                                                                                                                                                                                                                                                                                                                                                                                                                                                                                                                                                                                               | 4,927   |
| S24 | (MH "Students, Health Occupations+")                                                                                                                                                                                                                                                                                                                                                                                                                                                                                                                                                                                                                                                                                                                                                                                                                                                                                                                                                                                                                                                                                                                                                                                                                                                                                                                                                                                                                                                                                                                                                                                                                                     | 83,286  |
| S25 | TI ( young N2 (adult* or people) ) OR AB ( young N2 (adult* or people) )                                                                                                                                                                                                                                                                                                                                                                                                                                                                                                                                                                                                                                                                                                                                                                                                                                                                                                                                                                                                                                                                                                                                                                                                                                                                                                                                                                                                                                                                                                                                                                                                 | 70,293  |

|     |                                                                                                                                                                                                                                                                                                                                                                                                                                                                                                                                    |         |
|-----|------------------------------------------------------------------------------------------------------------------------------------------------------------------------------------------------------------------------------------------------------------------------------------------------------------------------------------------------------------------------------------------------------------------------------------------------------------------------------------------------------------------------------------|---------|
| S26 | TI ( (college* or undergraduate or postgraduate or university) N2 (age* or participant* or student*) ) OR AB ( (college* or undergraduate or postgraduate or university) N2 (age* or participant* or student*) )                                                                                                                                                                                                                                                                                                                   | 45,458  |
| S27 | TI ( "18 years" or "19 years" or "20 years" or "21 years" or "22 years" or "23 years" or "24 years" or "25 years" or "26 years" or "27 years" or "28 years" or "29 years" or "30 years" or "31 years" or "32 years" or "33 years" or "34 years" or "35 years" ) OR AB ( "18 years" or "19 years" or "20 years" or "21 years" or "22 years" or "23 years" or "24 years" or "25 years" or "26 years" or "27 years" or "28 years" or "29 years" or "30 years" or "31 years" or "32 years" or "33 years" or "34 years" or "35 years" ) | 106,821 |
| S28 | S22 OR S23 OR S24 OR S25 OR S26 OR S27                                                                                                                                                                                                                                                                                                                                                                                                                                                                                             | 314,161 |
| S29 | S17 AND S28                                                                                                                                                                                                                                                                                                                                                                                                                                                                                                                        | 502     |
| S30 | S21 OR S29                                                                                                                                                                                                                                                                                                                                                                                                                                                                                                                         | 1,977   |
| S31 | EM 202110* OR EM 202111* OR EM 202112* OR EM 2022* OR EM 2023*                                                                                                                                                                                                                                                                                                                                                                                                                                                                     | 530,653 |
| S32 | S30 AND S31                                                                                                                                                                                                                                                                                                                                                                                                                                                                                                                        | 349     |

## 2.2. Cochrane Database of Systematic Reviews and Central Register of Controlled Trials (Ovid)

Cochrane Central Register of Controlled Trials January 2023  
Cochrane Database of Systematic Reviews 2005 to February 8, 2023

|   |                                                                                                                                                                                                                                                                                                                                                                                                                                                                                                                                                                                                                                                                                                                                                                                                                                                                                                                                                                                            |        |
|---|--------------------------------------------------------------------------------------------------------------------------------------------------------------------------------------------------------------------------------------------------------------------------------------------------------------------------------------------------------------------------------------------------------------------------------------------------------------------------------------------------------------------------------------------------------------------------------------------------------------------------------------------------------------------------------------------------------------------------------------------------------------------------------------------------------------------------------------------------------------------------------------------------------------------------------------------------------------------------------------------|--------|
| 1 | (Cannabi* or Marihuana* or Marijuana* or Hemp or Hempes or Ganja or Ganjas or Hashish or Hashishs or Bhang or Bhangs or Smoking Blunt*).ti,ab.                                                                                                                                                                                                                                                                                                                                                                                                                                                                                                                                                                                                                                                                                                                                                                                                                                             | 4964   |
| 2 | (weed* adj3 (smok* or use* or using or abus* or dependen* or disorder*).ti,ab.                                                                                                                                                                                                                                                                                                                                                                                                                                                                                                                                                                                                                                                                                                                                                                                                                                                                                                             | 8      |
| 3 | 1 or 2                                                                                                                                                                                                                                                                                                                                                                                                                                                                                                                                                                                                                                                                                                                                                                                                                                                                                                                                                                                     | 4972   |
| 4 | (Web or website* or internet or echeckup or smartphone* or ((ios or android or smart or portable or cell) adj2 (device* or phone* or system* or platform* or application*)) or mobile or online or on-line or (chat adj2 (live or based or messenger* or group* or interface or function* or forum* or transcript* or session* or log or logs or counsel* or bot or bots or support* or room or rooms)) or computer* or mhealth or m-health or ehealth or e-health or app or apps or digital or SMS or messaging or Short Message Service* or texting or ((virtual or augmented) adj2 realit*) or Serious gam* or telemedicine or telehealth* or (tele adj2 (medicine or health*)) or blog or blogs or blogging or social media* or (wearable adj2 device*) or ((electronic or digital) adj3 (communicat* or learn* or game* or gaming))).ti,ab.                                                                                                                                           | 113077 |
| 5 | 3 and 4                                                                                                                                                                                                                                                                                                                                                                                                                                                                                                                                                                                                                                                                                                                                                                                                                                                                                                                                                                                    | 588    |
| 6 | (newborn* or new-born* or neonat* or neo-nat* or infan* or child* or adolesc* or paediatr* or pediater* or baby* or babies* or toddler* or kid or kids or boy* or girl* or juvenile* or youth or teen* or pubescen* or preadolesc* or prepubesc* or preteen or tween).ti.                                                                                                                                                                                                                                                                                                                                                                                                                                                                                                                                                                                                                                                                                                                  | 154041 |
| 7 | 5 not 6                                                                                                                                                                                                                                                                                                                                                                                                                                                                                                                                                                                                                                                                                                                                                                                                                                                                                                                                                                                    | 490    |
| 8 | ("20220131" or "20220207" or "20220214" or "20220221" or "20220228" or "20220307" or "20220314" or "20220321" or "20220328" or "20220404" or "20220411" or "20220418" or "20220425" or "20220502" or "20220509" or "20220516" or "20220523" or "20220531" or "20220606" or "20220613" or "20220620" or "20220627" or "20220704" or "20220711" or "20220718" or "20220725" or "202208" or "20220801" or "20220808" or "20220815" or "20220822" or "20220829" or "202209" or "20220905" or "20220912" or "20220919" or "20220926" or "202210" or "20221003" or "20221010" or "20221017" or "20221024" or "20221031" or "202211" or "20221107" or "20221114" or "20221121" or "20221128" or "202212" or "20221205" or "20221212" or "20221219" or "20221226" or "202301" or "20230102" or "20230109" or "20230116" or "20230123" or "20230130" or "20230206" or "20211011" or "20211018" or "20211025" or "20211101" or "20211108" or "20211115" or "20211122" or "20211129" or "20211206" or | 401436 |

|    |                                                                                                     |        |
|----|-----------------------------------------------------------------------------------------------------|--------|
|    | "20211213" or "20211220" or "20211227" or "20220103" or "20220110" or "20220117" or "20220124").up. |        |
| 9  | 7 and 8                                                                                             | 166    |
| 10 | ("2021" or "2022" or "2023").yr.                                                                    | 214793 |
| 11 | 9 and 10                                                                                            | 69     |

### 2.3. Embase (Ovid) <1974 to 2023 February 10>

|    |                                                                                                                                                                                                                                                                                                                                                                                                                                                                                                                                                                                                                                                                                                                                                                                                                                                                             |         |
|----|-----------------------------------------------------------------------------------------------------------------------------------------------------------------------------------------------------------------------------------------------------------------------------------------------------------------------------------------------------------------------------------------------------------------------------------------------------------------------------------------------------------------------------------------------------------------------------------------------------------------------------------------------------------------------------------------------------------------------------------------------------------------------------------------------------------------------------------------------------------------------------|---------|
| 1  | cannabis/                                                                                                                                                                                                                                                                                                                                                                                                                                                                                                                                                                                                                                                                                                                                                                                                                                                                   | 42692   |
| 2  | exp "cannabis use"/                                                                                                                                                                                                                                                                                                                                                                                                                                                                                                                                                                                                                                                                                                                                                                                                                                                         | 17130   |
| 3  | cannabis addiction/                                                                                                                                                                                                                                                                                                                                                                                                                                                                                                                                                                                                                                                                                                                                                                                                                                                         | 11438   |
| 4  | (Cannabi* or Marihuana* or Marijuana* or Hemp or Hemp* or Ganja or Ganjas or Hashish or Hashish* or Bhang or Bhangs or Smoking Blunt*).tw,kw.                                                                                                                                                                                                                                                                                                                                                                                                                                                                                                                                                                                                                                                                                                                               | 78477   |
| 5  | (weed* adj3 (smok* or use* or using or abus* or dependen* or disorder*)).tw,kw.                                                                                                                                                                                                                                                                                                                                                                                                                                                                                                                                                                                                                                                                                                                                                                                             | 777     |
| 6  | 1 or 2 or 3 or 4 or 5                                                                                                                                                                                                                                                                                                                                                                                                                                                                                                                                                                                                                                                                                                                                                                                                                                                       | 93178   |
| 7  | internet/                                                                                                                                                                                                                                                                                                                                                                                                                                                                                                                                                                                                                                                                                                                                                                                                                                                                   | 120526  |
| 8  | exp mobile phone/                                                                                                                                                                                                                                                                                                                                                                                                                                                                                                                                                                                                                                                                                                                                                                                                                                                           | 44398   |
| 9  | exp mobile application/                                                                                                                                                                                                                                                                                                                                                                                                                                                                                                                                                                                                                                                                                                                                                                                                                                                     | 22869   |
| 10 | computer/                                                                                                                                                                                                                                                                                                                                                                                                                                                                                                                                                                                                                                                                                                                                                                                                                                                                   | 84114   |
| 11 | exp personal computer/                                                                                                                                                                                                                                                                                                                                                                                                                                                                                                                                                                                                                                                                                                                                                                                                                                                      | 13101   |
| 12 | telemedicine/                                                                                                                                                                                                                                                                                                                                                                                                                                                                                                                                                                                                                                                                                                                                                                                                                                                               | 41574   |
| 13 | online system/                                                                                                                                                                                                                                                                                                                                                                                                                                                                                                                                                                                                                                                                                                                                                                                                                                                              | 29810   |
| 14 | text messaging/                                                                                                                                                                                                                                                                                                                                                                                                                                                                                                                                                                                                                                                                                                                                                                                                                                                             | 7177    |
| 15 | personal digital assistant/                                                                                                                                                                                                                                                                                                                                                                                                                                                                                                                                                                                                                                                                                                                                                                                                                                                 | 1755    |
| 16 | medical informatics/                                                                                                                                                                                                                                                                                                                                                                                                                                                                                                                                                                                                                                                                                                                                                                                                                                                        | 22687   |
| 17 | virtual reality/                                                                                                                                                                                                                                                                                                                                                                                                                                                                                                                                                                                                                                                                                                                                                                                                                                                            | 24536   |
| 18 | (Web or website* or internet or echeckup or smartphone* or ((ios or android or smart or portable or cell) adj2 (device* or phone* or system* or platform* or application*)) or mobile or online or on-line or text messag* or texting or (chat adj2 (live or based or messenger* or group* or interface or function* or forum* or transcript* or session* or log or logs or counsel* or bot or bots or support* or room or rooms)) or computer* or mhealth or m-health or ehealth or e-health or app or apps or digital or SMS or messaging or Short Message Service* or texting or ((virtual or augmented) adj2 realit*) or Serious gam* or telemedicine or telehealth* or (tele adj2 (medicine or health*)) or blog or blogs or blogging or social media* or (wearable adj2 device*) or ((electronic or digital) adj3 (communicat* or learn* or game* or gaming))).tw,kw. | 1521658 |
| 19 | or/7-18                                                                                                                                                                                                                                                                                                                                                                                                                                                                                                                                                                                                                                                                                                                                                                                                                                                                     | 1630394 |
| 20 | 6 and 19                                                                                                                                                                                                                                                                                                                                                                                                                                                                                                                                                                                                                                                                                                                                                                                                                                                                    | 5746    |
| 21 | (exp child/ or exp adolescent/) not exp adult/                                                                                                                                                                                                                                                                                                                                                                                                                                                                                                                                                                                                                                                                                                                                                                                                                              | 2443694 |
| 22 | (newborn* or new-born* or neonat* or neo-nat* or infan* or child* or adolesc* or paediatr* or pediater* or baby* or babies* or toddler* or kid or kids or boy* or girl* or juvenile* or teen* or youth* or pubescen* or preadolesc* or prepubesc* or preteen or tween).ti.                                                                                                                                                                                                                                                                                                                                                                                                                                                                                                                                                                                                  | 2013280 |
| 23 | (pediatr* or paediatr*).jx.                                                                                                                                                                                                                                                                                                                                                                                                                                                                                                                                                                                                                                                                                                                                                                                                                                                 | 774514  |
| 24 | 21 or 22 or 23                                                                                                                                                                                                                                                                                                                                                                                                                                                                                                                                                                                                                                                                                                                                                                                                                                                              | 3235487 |
| 25 | 20 not 24                                                                                                                                                                                                                                                                                                                                                                                                                                                                                                                                                                                                                                                                                                                                                                                                                                                                   | 4834    |
| 26 | student/ or college student/ or postgraduate student/ or undergraduate student/ or university student/                                                                                                                                                                                                                                                                                                                                                                                                                                                                                                                                                                                                                                                                                                                                                                      | 167594  |
| 27 | (young adj2 (adult or people)).tw,kw.                                                                                                                                                                                                                                                                                                                                                                                                                                                                                                                                                                                                                                                                                                                                                                                                                                       | 99270   |
| 28 | ((college* or undergraduate or postgraduate or university) adj2 (age* or participant* or student*)).tw,kw.                                                                                                                                                                                                                                                                                                                                                                                                                                                                                                                                                                                                                                                                                                                                                                  | 84054   |

|    |                                                                                                                                                                                                                                                                   |         |
|----|-------------------------------------------------------------------------------------------------------------------------------------------------------------------------------------------------------------------------------------------------------------------|---------|
| 29 | ("18 years" or "19 years" or "20 years" or "21 years" or "22 years" or "23 years" or "24 years" or "25 years" or "26 years" or "27 years" or "28 years" or "29 years" or "30 years" or "31 years" or "32 years" or "33 years" or "34 years" or "35 years").tw,kw. | 769852  |
| 30 | or/26-29                                                                                                                                                                                                                                                          | 1038519 |
| 31 | 20 and 30                                                                                                                                                                                                                                                         | 1141    |
| 32 | 25 or 31                                                                                                                                                                                                                                                          | 5119    |
| 33 | remove duplicates from 32                                                                                                                                                                                                                                         | 4895    |
| 34 | ("20211013" or "20211014" or "20211015" or "20211016" or "20211017" or "20211018" or "20211019" or 2021102* or 2021103* or 202111* or 202112* or 2022* or 2023*).dc,dd.                                                                                           | 2857942 |
| 35 | 33 and 34                                                                                                                                                                                                                                                         | 1068    |

## 2.4. Ovid MEDLINE(R) ALL <1946 to February 10, 2023>

Medline search strategy peer reviewed by a second librarian.

|    |                                                                                                                                                                                                                                                                                                                                                                                                                                                                                                                                                                                                                                                                                                                                                                                                                                                  |         |
|----|--------------------------------------------------------------------------------------------------------------------------------------------------------------------------------------------------------------------------------------------------------------------------------------------------------------------------------------------------------------------------------------------------------------------------------------------------------------------------------------------------------------------------------------------------------------------------------------------------------------------------------------------------------------------------------------------------------------------------------------------------------------------------------------------------------------------------------------------------|---------|
| 1  | Cannabis/                                                                                                                                                                                                                                                                                                                                                                                                                                                                                                                                                                                                                                                                                                                                                                                                                                        | 13129   |
| 2  | exp "Marijuana Use"/                                                                                                                                                                                                                                                                                                                                                                                                                                                                                                                                                                                                                                                                                                                                                                                                                             | 6956    |
| 3  | Marijuana abuse/                                                                                                                                                                                                                                                                                                                                                                                                                                                                                                                                                                                                                                                                                                                                                                                                                                 | 6987    |
| 4  | (Cannabi* or Marihuana* or Marijuana* or Hemp or Hemp* or Ganja or Ganjas or Hashish or Hashish* or Bhang or Bhangs or Smoking Blunt*).tw,kf.                                                                                                                                                                                                                                                                                                                                                                                                                                                                                                                                                                                                                                                                                                    | 59014   |
| 5  | (weed* adj3 (smok* or use* or using or abus* or dependen* or disorder*)).tw,kf.                                                                                                                                                                                                                                                                                                                                                                                                                                                                                                                                                                                                                                                                                                                                                                  | 722     |
| 6  | or/1-5                                                                                                                                                                                                                                                                                                                                                                                                                                                                                                                                                                                                                                                                                                                                                                                                                                           | 63043   |
| 7  | Internet/                                                                                                                                                                                                                                                                                                                                                                                                                                                                                                                                                                                                                                                                                                                                                                                                                                        | 80634   |
| 8  | Internet-Based Intervention/                                                                                                                                                                                                                                                                                                                                                                                                                                                                                                                                                                                                                                                                                                                                                                                                                     | 1076    |
| 9  | Smartphone/                                                                                                                                                                                                                                                                                                                                                                                                                                                                                                                                                                                                                                                                                                                                                                                                                                      | 8654    |
| 10 | Mobile Applications/                                                                                                                                                                                                                                                                                                                                                                                                                                                                                                                                                                                                                                                                                                                                                                                                                             | 10994   |
| 11 | Computers/                                                                                                                                                                                                                                                                                                                                                                                                                                                                                                                                                                                                                                                                                                                                                                                                                                       | 53096   |
| 12 | Telemedicine/                                                                                                                                                                                                                                                                                                                                                                                                                                                                                                                                                                                                                                                                                                                                                                                                                                    | 36166   |
| 13 | Online systems/                                                                                                                                                                                                                                                                                                                                                                                                                                                                                                                                                                                                                                                                                                                                                                                                                                  | 8545    |
| 14 | Text messaging/                                                                                                                                                                                                                                                                                                                                                                                                                                                                                                                                                                                                                                                                                                                                                                                                                                  | 4379    |
| 15 | Cell phone/                                                                                                                                                                                                                                                                                                                                                                                                                                                                                                                                                                                                                                                                                                                                                                                                                                      | 9897    |
| 16 | Computers handheld/                                                                                                                                                                                                                                                                                                                                                                                                                                                                                                                                                                                                                                                                                                                                                                                                                              | 4034    |
| 17 | Medical Informatics Applications/                                                                                                                                                                                                                                                                                                                                                                                                                                                                                                                                                                                                                                                                                                                                                                                                                | 2550    |
| 18 | Virtual reality/                                                                                                                                                                                                                                                                                                                                                                                                                                                                                                                                                                                                                                                                                                                                                                                                                                 | 5141    |
| 19 | Augmented reality/                                                                                                                                                                                                                                                                                                                                                                                                                                                                                                                                                                                                                                                                                                                                                                                                                               | 1043    |
| 20 | (Web or website* or internet or echeckup or smartphone* or ((ios or android or smart or portable or cell) adj2 (device* or phone* or system* or platform* or application*)) or mobile or online or on-line or (chat adj2 (live or based or messenger* or group* or interface or function* or forum* or transcript* or session* or log or logs or counsel* or bot or bots or support* or room or rooms)) or computer* or mhealth or m-health or ehealth or e-health or app or apps or digital or SMS or messaging or Short Message Service* or texting or ((virtual or augmented) adj2 realit*) or Serious gam* or telemedicine or telehealth* or (tele adj2 (medicine or health*)) or blog or blogs or blogging or social media* or (wearable adj2 device*) or ((electronic or digital) adj3 (communicat* or learn* or game* or gaming))).tw,kf. | 1197077 |
| 21 | or/7-20                                                                                                                                                                                                                                                                                                                                                                                                                                                                                                                                                                                                                                                                                                                                                                                                                                          | 1257184 |
| 22 | 6 and 21                                                                                                                                                                                                                                                                                                                                                                                                                                                                                                                                                                                                                                                                                                                                                                                                                                         | 3591    |
| 23 | (exp child/ or exp infant/ or adolescent/) not exp adult/                                                                                                                                                                                                                                                                                                                                                                                                                                                                                                                                                                                                                                                                                                                                                                                        | 2109159 |
| 24 | (newborn* or new-born* or neonat* or neo-nat* or infan* or child* or adolesc* or paediatr* or pediater* or baby* or babies* or toddler* or kid or kids or boy* or girl* or                                                                                                                                                                                                                                                                                                                                                                                                                                                                                                                                                                                                                                                                       | 1709151 |

|    |                                                                                                                                                                                                                                                                   |         |
|----|-------------------------------------------------------------------------------------------------------------------------------------------------------------------------------------------------------------------------------------------------------------------|---------|
|    | juvenile* or youth or teen* or pubescen* or preadolesc* or prepubesc* or preteen or tween).ti.                                                                                                                                                                    |         |
| 25 | (pediatr* or paediatr*).jw.                                                                                                                                                                                                                                       | 631543  |
| 26 | or/23-25                                                                                                                                                                                                                                                          | 2756871 |
| 27 | 22 not 26                                                                                                                                                                                                                                                         | 3032    |
| 28 | students/                                                                                                                                                                                                                                                         | 77680   |
| 29 | (young adj2 (adult or people)).tw,kf.                                                                                                                                                                                                                             | 76425   |
| 30 | ((college* or undergraduate or postgraduate or university) adj2 (age* or participant* or student*)).tw,kf.                                                                                                                                                        | 68954   |
| 31 | ("18 years" or "19 years" or "20 years" or "21 years" or "22 years" or "23 years" or "24 years" or "25 years" or "26 years" or "27 years" or "28 years" or "29 years" or "30 years" or "31 years" or "32 years" or "33 years" or "34 years" or "35 years").tw,kf. | 500854  |
| 32 | or/28-31                                                                                                                                                                                                                                                          | 676462  |
| 33 | 22 and 32                                                                                                                                                                                                                                                         | 740     |
| 34 | 27 or 33                                                                                                                                                                                                                                                          | 3228    |
| 35 | remove duplicates from 34                                                                                                                                                                                                                                         | 3220    |
| 36 | ("20211013" or "20211014" or "20211015" or "20211016" or "20211017" or "20211018" or "20211019" or 2021102* or 2021103* or 202111* or 202112* or 2022* or 2023*).ed,dt,ez.                                                                                        | 2653020 |
| 37 | 35 and 36                                                                                                                                                                                                                                                         | 817     |

## 2.5. PsycINFO (Ovid) <1806 to January Week 5 2023>

|    |                                                                                                                                                                                |        |
|----|--------------------------------------------------------------------------------------------------------------------------------------------------------------------------------|--------|
| 1  | exp cannabis/                                                                                                                                                                  | 10533  |
| 2  | "cannabis use disorder"/                                                                                                                                                       | 673    |
| 3  | marijuana usage/                                                                                                                                                               | 3330   |
| 4  | (Cannabi* or Marihuana* or Marijuana* or Hemp or Hemsps or Ganja or Ganjas or Hashish or Hashishs or Bhang or Bhangs or Smoking Blunt*).ti,ab,id.                              | 28912  |
| 5  | (weed* adj3 (smok* or use* or using or abus* or dependen* or disorder*)).ti,ab,id.                                                                                             | 19     |
| 6  | or/1-5                                                                                                                                                                         | 29322  |
| 7  | internet/                                                                                                                                                                      | 30782  |
| 8  | exp mobile phones/                                                                                                                                                             | 7263   |
| 9  | mobile devices/                                                                                                                                                                | 2966   |
| 10 | digital gaming/                                                                                                                                                                | 2530   |
| 11 | electronic communication/                                                                                                                                                      | 3289   |
| 12 | computer mediated communication/                                                                                                                                               | 6605   |
| 13 | exp websites/                                                                                                                                                                  | 6815   |
| 14 | electronic learning/                                                                                                                                                           | 3126   |
| 15 | mobile health/                                                                                                                                                                 | 1933   |
| 16 | mobile applications/                                                                                                                                                           | 2106   |
| 17 | mobile technology/                                                                                                                                                             | 334    |
| 18 | wearable devices/                                                                                                                                                              | 657    |
| 19 | computers/                                                                                                                                                                     | 10904  |
| 20 | telemedicine/                                                                                                                                                                  | 7303   |
| 21 | text messaging/                                                                                                                                                                | 1415   |
| 22 | Virtual reality/ or augmented reality/                                                                                                                                         | 11122  |
| 23 | computer simulation/                                                                                                                                                           | 4808   |
| 24 | mobile learning/                                                                                                                                                               | 833    |
| 25 | online community/ or online social networks/                                                                                                                                   | 11160  |
| 26 | social media/                                                                                                                                                                  | 14080  |
| 27 | digital game-based learning/                                                                                                                                                   | 414    |
| 28 | (Web or website* or internet or echeckup or smartphone* or ((ios or android or smart or portable or cell) adj2 (device* or phone* or system* or platform* or application*)) or | 349426 |

|    |                                                                                                                                                                                                                                                                                                                                                                                                                                                                                                                                                                                                                                                                      |        |
|----|----------------------------------------------------------------------------------------------------------------------------------------------------------------------------------------------------------------------------------------------------------------------------------------------------------------------------------------------------------------------------------------------------------------------------------------------------------------------------------------------------------------------------------------------------------------------------------------------------------------------------------------------------------------------|--------|
|    | mobile or online or on-line or (chat adj2 (live or based or messenger* or group* or interface or function* or forum* or transcript* or session* or log or logs or counsel* or bot or bots or support* or room or rooms)) or computer* or mhealth or m-health or ehealth or e-health or app or apps or digital or SMS or messaging or Short Message Service* or texting or ((virtual or augmented) adj2 realit*) or Serious gam* or telemedicine or telehealth* or (tele adj2 (medicine or health*)) or blog or blogs or blogging or social media* or (wearable adj2 device*) or ((electronic or digital) adj3 (communicat* or learn* or game* or gaming))).ti,ab,id. |        |
| 29 | or/7-28                                                                                                                                                                                                                                                                                                                                                                                                                                                                                                                                                                                                                                                              | 361663 |
| 30 | 6 and 29                                                                                                                                                                                                                                                                                                                                                                                                                                                                                                                                                                                                                                                             | 1976   |
| 31 | (newborn* or new-born* or neonat* or neo-nat* or infan* or child* or adolesc* or paediatr* or pediater* or baby* or babies* or toddler* or kid or kids or boy* or girl* or juvenile* or teen* or youth* or pubescen* or preadolesc* or prepubesc* or preteen or tween).ti.                                                                                                                                                                                                                                                                                                                                                                                           | 625008 |
| 32 | (pediatr* or paediatr*).jn.                                                                                                                                                                                                                                                                                                                                                                                                                                                                                                                                                                                                                                          | 4449   |
| 33 | 31 or 32                                                                                                                                                                                                                                                                                                                                                                                                                                                                                                                                                                                                                                                             | 626258 |
| 34 | 30 not 33                                                                                                                                                                                                                                                                                                                                                                                                                                                                                                                                                                                                                                                            | 1635   |
| 35 | exp students/ or college students/ or graduate students/ or medical students/ or postgraduate students/                                                                                                                                                                                                                                                                                                                                                                                                                                                                                                                                                              | 297958 |
| 36 | (young adj2 (adult or people)).ti,ab,id.                                                                                                                                                                                                                                                                                                                                                                                                                                                                                                                                                                                                                             | 51110  |
| 37 | ((college* or undergraduate or postgraduate or university) adj2 (age* or participant* or student*)).ti,ab,id.                                                                                                                                                                                                                                                                                                                                                                                                                                                                                                                                                        | 222841 |
| 38 | ("18 years" or "19 years" or "20 years" or "21 years" or "22 years" or "23 years" or "24 years" or "25 years" or "26 years" or "27 years" or "28 years" or "29 years" or "30 years" or "31 years" or "32 years" or "33 years" or "34 years" or "35 years").ti,ab,id.                                                                                                                                                                                                                                                                                                                                                                                                 | 88240  |
| 39 | 35 or 36 or 37 or 38                                                                                                                                                                                                                                                                                                                                                                                                                                                                                                                                                                                                                                                 | 563709 |
| 40 | 30 and 39                                                                                                                                                                                                                                                                                                                                                                                                                                                                                                                                                                                                                                                            | 560    |
| 41 | 34 or 40                                                                                                                                                                                                                                                                                                                                                                                                                                                                                                                                                                                                                                                             | 1744   |
| 42 | remove duplicates from 41                                                                                                                                                                                                                                                                                                                                                                                                                                                                                                                                                                                                                                            | 1741   |
| 43 | ("20211013" or "20211014" or "20211015" or "20211016" or "20211017" or "20211018" or "20211019" or 2021102* or 2021103* or 202111* or 202112* or 2022* or 2023*).up.                                                                                                                                                                                                                                                                                                                                                                                                                                                                                                 | 239529 |
| 44 | 42 and 43                                                                                                                                                                                                                                                                                                                                                                                                                                                                                                                                                                                                                                                            | 283    |

## 2.6. PubMed <Oct 6 to Oct 13>

|                                                                                                                                                                                                                                                                                                                                                                                                                                                                                                                                                                                                                                                                                                                                                                                                                                                                                                                                                                                                                                                                                                                                                                                                                                                                                                                                                                                                                                                                                                                                                                                                                                                                           |    |
|---------------------------------------------------------------------------------------------------------------------------------------------------------------------------------------------------------------------------------------------------------------------------------------------------------------------------------------------------------------------------------------------------------------------------------------------------------------------------------------------------------------------------------------------------------------------------------------------------------------------------------------------------------------------------------------------------------------------------------------------------------------------------------------------------------------------------------------------------------------------------------------------------------------------------------------------------------------------------------------------------------------------------------------------------------------------------------------------------------------------------------------------------------------------------------------------------------------------------------------------------------------------------------------------------------------------------------------------------------------------------------------------------------------------------------------------------------------------------------------------------------------------------------------------------------------------------------------------------------------------------------------------------------------------------|----|
| <p>(((((Cannabi*[Title/Abstract] OR Marihuana*[Title/Abstract] OR Marijuana*[Title/Abstract] OR Hemp[Title/Abstract] OR Hems[Title/Abstract] OR Ganja[Title/Abstract] OR Ganjas[Title/Abstract] OR Hashish[Title/Abstract] OR Hashishs[Title/Abstract] OR Bhang[Title/Abstract] OR Bhangs[Title/Abstract] OR "Smoking Blunt"[Title/Abstract]))) AND (Web[tiab] or website*[tiab] or internet[tiab] or echeckup[tiab] or smartphone*[tiab] or ((ios[tiab] or android[tiab] or smart[tiab] or portable[tiab] or cell[tiab]) AND (device*[tiab] or phone*[tiab] or system*[tiab] or platform*[tiab] or application*[tiab]))) or mobile[tiab] or online[tiab] or "on-line"[tiab] or (chat[tiab] AND (live[tiab] or based[tiab] or messenger*[tiab] or group*[tiab] or interface[tiab] or function*[tiab] or forum*[tiab] or transcript*[tiab] or session*[tiab] or log[tiab] or logs[tiab] or counsel*[tiab] or bot[tiab] or bots[tiab] or support*[tiab] or room[tiab] or rooms[tiab])) or computer*[tiab] or mhealth[tiab] or 'm-health'[tiab] or ehealth[tiab] or "e-health"[tiab] or app[tiab] or apps[tiab] or digital[tiab] or SMS[tiab] or messaging[tiab] or "Short Message Service"[tiab] or texting[tiab] or "virtual realit"[tiab] or "augmented realit"[tiab] or "Serious gam"[tiab] or telemedicine[tiab] or telehealth*[tiab] or "tele medicine"[tiab] or "tele health"[tiab] or blog[tiab] or blogs[tiab] or blogging[tiab] or "social media"[tiab] or "wearable device"[tiab] or ((electronic[tiab] or digital[tiab]) AND (communicat*[tiab] or learn*[tiab] or game*[tiab] or gaming[tiab]))) AND ("2023/02/07"[Date - Create] : "30:0"[Date - Create]))</p> | 19 |
|---------------------------------------------------------------------------------------------------------------------------------------------------------------------------------------------------------------------------------------------------------------------------------------------------------------------------------------------------------------------------------------------------------------------------------------------------------------------------------------------------------------------------------------------------------------------------------------------------------------------------------------------------------------------------------------------------------------------------------------------------------------------------------------------------------------------------------------------------------------------------------------------------------------------------------------------------------------------------------------------------------------------------------------------------------------------------------------------------------------------------------------------------------------------------------------------------------------------------------------------------------------------------------------------------------------------------------------------------------------------------------------------------------------------------------------------------------------------------------------------------------------------------------------------------------------------------------------------------------------------------------------------------------------------------|----|



### 3. Results of the literature search update (February 13, 2023), for each database

| Database                    | Results Before Duplicate Removal | Duplicates Deleted | Results to screen After Duplicate Removal | % Retained   |
|-----------------------------|----------------------------------|--------------------|-------------------------------------------|--------------|
| CINAHL                      | 349                              | 260                | 89                                        | 25,5%        |
| Cochrane Library et CENTRAL | 69                               | 53                 | 16                                        | 23,2%        |
| Embase                      | 1068                             | 675                | 393                                       | 36,8%        |
| Medline                     | 817                              | 196                | 621                                       | 76,0%        |
| PsycINFO                    | 283                              | 239                | 44                                        | 15,5%        |
| PubMed                      | 19                               | 7                  | 12                                        | 63,2%        |
| <b>Total</b>                | <b>2605</b>                      | <b>1430</b>        | <b>1175</b>                               | <b>45,1%</b> |
