# Supplementary material for: Digital Interventions for Recreational Cannabis Use Among Young Adults: Systematic Review, Meta-Analysis, and Behavior Change Technique Analysis of Randomized Controlled Studies
Source: PubMed Central journal article supplement (PMC11063887; doi:10.2196/55031), 2024-04-17
Supplement: jmir_v26i1e55031_app4.pdf [file jmir_v26i1e55031_app4.pdf]

## Multimedia Appendix 4. Excluded studies and reasons for exclusion.

| Ref ID | Reason for exclusion: Wrong type of papers (n = 36)                                                                                                                                                                                                                                                                                                      |
|--------|----------------------------------------------------------------------------------------------------------------------------------------------------------------------------------------------------------------------------------------------------------------------------------------------------------------------------------------------------------|
| 73     | ACTRN. (2009). Web-based intervention for cannabis use. <a href="http://www.who.int/trialsearch/Trial2.aspx?TrialID=ACTRN12609000856213">http://www.who.int/trialsearch/Trial2.aspx?TrialID=ACTRN12609000856213</a>                                                                                                                                      |
| 324    | Martz, M. E., Waller, R., Drislane, L. E., Bonar, E. E., Walton, M. A., Cunningham, R. M., & Blow, F. C. (2018). Therapist and computer-based brief interventions within a randomized controlled trial: effects on parallel trajectories of alcohol use, marijuana use, and anxiety. In <i>Alcoholism-Clinical and Experimental Research</i> , 42, 198A. |
| 392    | Toulet, V. D. (2015). Synthetic cannabis on the web: A mouse game! <i>Toxicologie Analytique et Clinique</i> , 27(1), 45-47.                                                                                                                                                                                                                             |
| 598    | NCT. (2019). Social Media Intervention for Cannabis Use in Emerging Adults. <a href="https://clinicaltrials.gov/show/NCT04187989">https://clinicaltrials.gov/show/NCT04187989</a>                                                                                                                                                                        |
| 625    | Zhang, M. W., & Ho, R. C. (2016). Smartphone for the smarter delivery of drugs, psychoeducational materials and acute intervention for at-risk users. <i>BMJ Innovations</i> , 2(3).                                                                                                                                                                     |
| 628    | Rooke, S., Webb, L., Albertella, L., & Copeland, J. (2015). A smartphone application for managing cannabis use. <i>Drug and Alcohol Dependence</i> , 100(156), e192.                                                                                                                                                                                     |
| 899    | Kellis, M., & Shrier, L. A. (2017). Reducing cannabis use with a real-time intervention using mobile technology. In <i>Handbook of Cannabis and Related Pathologies</i> (pp. 1101-1110). Academic Press.                                                                                                                                                 |
| 954    | ACTRN. (2016). A randomised controlled trial of a smartphone application for people wanting to reduce or quit their use of cannabis. <a href="https://www.who.int/trialsearch/Trial2.aspx?TrialID=ACTRN12616000622404">https://www.who.int/trialsearch/Trial2.aspx?TrialID=ACTRN12616000622404</a>                                                       |
| 1099   | NCT. (2019). Project RAD: a Brief Intervention for Young Adult Alcohol or Marijuana Users. <a href="https://clinicaltrials.gov/show/NCT03801096">https://clinicaltrials.gov/show/NCT03801096</a>                                                                                                                                                         |
| 1243   | Bedrouni, W. (2018). On the use of digital technologies to reduce the public health impacts of cannabis legalization in Canada. <i>Canadian Journal of Public Health</i> , 109, 748-751.                                                                                                                                                                 |
| 1611   | NCT. (2017). Personalized Health Assessment Related to Medications (Project PHARM). <a href="https://clinicaltrials.gov/show/NCT03037476">https://clinicaltrials.gov/show/NCT03037476</a>                                                                                                                                                                |
| 1612   | NCT. (2019). Personalized Feedback Intervention to Reduce Risky Cannabis Use. <a href="https://clinicaltrials.gov/show/NCT04060602">https://clinicaltrials.gov/show/NCT04060602</a>                                                                                                                                                                      |
| 1706   | Palfai, T., Saitz, R., & Winter, M. R. (2015). Moderators of electronic screening and brief intervention for marijuana among students in a health center: eCHECKUP TO GO bolsters efforts of those who are already trying to change. <i>Drug and Alcohol Dependence</i> , 100(156), e170.                                                                |
| 1822   | Putnam, J., Skinner, K., & Kiger, A. (2018). Marijuana and Missouri college health promotion: an exploratory study. <i>Missouri Nurse</i> , 12-15.                                                                                                                                                                                                       |
| 1967   | ACTRN. (2018). Keep it Real: a web-based program for psychotic-like experiences and cannabis use. <a href="http://www.who.int/trialsearch/Trial2.aspx?TrialID=ACTRN1261800110721">http://www.who.int/trialsearch/Trial2.aspx?TrialID=ACTRN1261800110721</a>                                                                                              |
| 2045   | (2015). Interactive App Teaches Skills for Conversations about Alcohol and Marijuana Use. <i>Colorado Nurse</i> , 118, 5.                                                                                                                                                                                                                                |
| 2129   | ACTRN. (2018). Implementation and effectiveness of an early intervention program (QuikFix) for young people experiencing alcohol and other drug-related harm. <a href="http://www.who.int/trialsearch/Trial2.aspx?TrialID=ACTRN12618001010280">http://www.who.int/trialsearch/Trial2.aspx?TrialID=ACTRN12618001010280</a> .                              |
| 2250   | WHO. ICAN: an online training to reduce cannabis use. <a href="http://www.who.int/trialsearch/Trial2.aspx?TrialID=NL7668">http://www.who.int/trialsearch/Trial2.aspx?TrialID=NL7668</a>                                                                                                                                                                  |
| 2421   | NCT. (2015). Internet-Based Treatment for Individuals With Regular Cannabis Use: a Randomized Controlled Trial. <a href="https://clinicaltrials.gov/show/NCT02408640">https://clinicaltrials.gov/show/NCT02408640</a>                                                                                                                                    |
| 2422   | Drks. (2014). Internet based Social Norms Intervention for substance use prevention for Students'-study. <a href="http://www.who.int/trialsearch/Trial2.aspx?TrialID=DRKS00007635">http://www.who.int/trialsearch/Trial2.aspx?TrialID=DRKS00007635</a> .                                                                                                 |
| 2445   | Smelror, R. E., Bless, J. J., Hugdahl, K., & Agartz, I. (2019). Feasibility and acceptability of using a mobile phone app for characterizing auditory verbal hallucinations in adolescents with early-onset psychosis: Exploratory study. <i>JMIR Formative Research</i> , 3(2), e13882.                                                                 |

|      |                                                                                                                                                                                                                                                                                                                                            |
|------|--------------------------------------------------------------------------------------------------------------------------------------------------------------------------------------------------------------------------------------------------------------------------------------------------------------------------------------------|
| 2556 | ISRCTN. (2010). Evaluation of an internet-based one-time counselling intervention for young cannabis- or alcohol-users. <a href="http://www.who.int/trialsearch/Trial2.aspx?TrialID=ISRCTN79857771">http://www.who.int/trialsearch/Trial2.aspx?TrialID=ISRCTN79857771</a> .                                                                |
| 2557 | Elliott, J. C. (2012). <i>Evaluation of a Web-based intervention for college marijuana use</i> (Doctoral dissertation, Syracuse University).                                                                                                                                                                                               |
| 2724 | Collier, R. (2017). Health Canada to warn young people of cannabis risks in campaign. <i>Canadian Medical Association Journal</i> , 189(41), E1297. <a href="https://doi.org/10.1503/cmaj.109-5506">https://doi.org/10.1503/cmaj.109-5506</a>                                                                                              |
| 2766 | Blow, F., Bohnert, A. S., Ignacio, R., Barry, K., Ilgen, M. A., Booth, B. M., ... & Walton, M. (2015). Efficacy of computer and therapist brief interventions for drug users. <i>Drug and Alcohol Dependence</i> , 100(156), e21.                                                                                                          |
| 2788 | Amann, M., Haug, S., Wenger, A., Baumgartner, C., Ebert, D. D., Berger, T., ... & Schaub, M. P. (2018). The effects of social presence on adherence-focused guidance in problematic cannabis users: protocol for the CANreduce 2.0 randomized controlled trial. <i>JMIR Research Protocols</i> , 7(1), e9484.                              |
| 2957 | NCT. (2013). An Exercise App to Reduce Young Adults' MJ Use. <a href="https://clinicaltrials.gov/show/NCT01863095">https://clinicaltrials.gov/show/NCT01863095</a>                                                                                                                                                                         |
| 3068 | Gagnon, H., Côté, J., Tessier, S. & April, N. (2012). Development of a Web platform to reduce cannabis use among youth who attend adult education centres. <i>Drogues, Santé et Société</i> , 11(2), 1-17.                                                                                                                                 |
| 3427 | (2017). CDPH Offering Online Cannabis Guidance. <i>Occupational Health &amp; Safety News</i> , 1-2.                                                                                                                                                                                                                                        |
| 3456 | Schneeberger, D., Bonar, E. E., Bauermeister, J., Young, S., Blow, F. C., Bourque, C., ... & Walton, M. A. (2019). Developing a motivational interviewing fidelity coding scheme for alcohol interventions delivered by e-health coaches on social media. <i>Alcoholism-Clinical and Experimental Research</i> , 43, 79A.                  |
| 3472 | ISRCTN. (2016). CANreduce 2.0 - comparing two differently optimized versions of a web-based self-help program to reduce cannabis use with each other and a waiting list. <a href="http://www.who.int/trialsearch/Trial2.aspx?TrialID=ISRCTN11086185">http://www.who.int/trialsearch/Trial2.aspx?TrialID=ISRCTN11086185</a> .               |
| 3612 | Schaub, M. P., Haug, S., Wenger, A., Berg, O., Sullivan, R., Beck, T., & Stark, L. (2013). Can reduce-the effects of chat-counseling and web-based self-help, web-based self-help alone and a waiting list control program on cannabis use in problematic cannabis users: a randomized controlled trial. <i>BMC Psychiatry</i> , 13, 1-10. |
| 3637 | Jones, H. (2013). Brief Interventions for Cannabis Use: Increasing Engagement and Motivation for Change in Young People. <i>Turkish Archives of Pediatrics</i> , 48(Suppl 2), 125.                                                                                                                                                         |
| 3745 | Copeland, J., Rooke, S., & Gibson, L. (2017). Comparison of brief versus extended feedback in an online intervention for cannabis users: A randomised controlled trial. <i>Drug and Alcohol Dependence</i> , 100(171), e45.                                                                                                                |
| 4179 | Gardner, L. (2018). Internet-Based Prevention for Alcohol and Other Drugs: An Overview of the Universal Climate Schools Prevention Programs. In <i>65th Annual Meeting</i> . AACAP.                                                                                                                                                        |
| 4501 | Llanes, K. D. (2020). <i>Comparing the Language of Computer-mediated Versus Face-to-face Motivational-type Interviews</i> (Doctoral dissertation, The University of Texas at El Paso).                                                                                                                                                     |
