# Supplementary material for: Digital Interventions for Recreational Cannabis Use Among Young Adults: Systematic Review, Meta-Analysis, and Behavior Change Technique Analysis of Randomized Controlled Studies
Source: PubMed Central journal article supplement (PMC11063887; doi:10.2196/55031), 2024-04-17
Supplement: jmir_v26i1e55031_app5.pdf [file jmir_v26i1e55031_app5.pdf]

## Multimedia Appendix 5. Study and participant characteristics.

| Study                    | Country     | Study aim                                                                                                                                                                                                                                                      | Study design | Intervention condition                                                                                                                                                                                                                                     | Comparator(s)                                                                                                                                                                                                                                                          | Participant characteristics                                                                                                |                     |               |                 |
|--------------------------|-------------|----------------------------------------------------------------------------------------------------------------------------------------------------------------------------------------------------------------------------------------------------------------|--------------|------------------------------------------------------------------------------------------------------------------------------------------------------------------------------------------------------------------------------------------------------------|------------------------------------------------------------------------------------------------------------------------------------------------------------------------------------------------------------------------------------------------------------------------|----------------------------------------------------------------------------------------------------------------------------|---------------------|---------------|-----------------|
|                          |             |                                                                                                                                                                                                                                                                |              |                                                                                                                                                                                                                                                            |                                                                                                                                                                                                                                                                        | Population                                                                                                                 | Baseline sample (n) | Mean age (SD) | Gender (female) |
| Baumgartner et al., 2021 | Switzerland | "To investigate whether intervention effectiveness and program adherence can be increased by implementing adherence-focused guidance and emphasizing the social presence factor of a personal eCoach when compared with a general support team implementation" | RCT          | <b>Brief description:</b> Minimally guided internet-based self-help intervention with a personal online coach (eCoach)<br><b>Name:</b> CANreduce 2.0 with social presence                                                                                  | <b>Active comparator:</b> CANreduce 2.0 with an impersonal service team<br><b>Passive comparator:</b> Waiting list (access to internet as usual)                                                                                                                       | Adult cannabis users; 18+ years old; who reported CU at least once weekly over the last 30 days                            | 575                 | 28.3 (7.9)    | 29.4%           |
| Bonar et al., 2022       | USA         | "To develop and pilot-test a new 8-week social media intervention for emerging adults' CU"                                                                                                                                                                     | Pilot RCT    | <b>Brief description:</b> Social media-delivered, MI and CBT-based intervention targeting CU among emerging adults<br><b>Name:</b> NR <sup>a</sup>                                                                                                         | <b>Passive comparator:</b> Attention control (Facebook private group in which staff posted manual-based content and brief responses to participant comments, unrelated to CU or mental health and not using therapeutic techniques)                                    | Emerging adults (ages 18–25); who used cannabis ≥ 3 times/week in the past-month                                           | 149                 | 21.0 (2.2)    | 55.7%           |
| Bonar et al., 2023       | USA         | "To develop and evaluate a physical activity-focused social-media delivered cannabis intervention for emerging adults"                                                                                                                                         | Pilot RCT    | <b>Brief description:</b> Social media-delivered intervention for emerging adults who use cannabis that focuses on physical activity, and includes MI and CBT cannabis intervention content (physical activity + cannabis)<br><b>Name:</b> NR <sup>a</sup> | <b>Active comparator:</b> Facebook group with e-coaches posting content aligning with physical activity-focused topics (physical activity only)<br><b>Passive comparator:</b> Attention control (manualized content posted in the Facebook group unrelated to physical | Emerging adults (ages 18–25); who reported past-month cannabis consumption ≥ 3 times; ability to safely engage in exercise | 60                  | 21.7 (2.3)    | 63.3%           |

|                         |           |                                                                                                                                                                                                                         |           |                                                                                                                                                                                                                                                                                              |                                                                                                                |                                                                                                                       |     |                                                   |       |
|-------------------------|-----------|-------------------------------------------------------------------------------------------------------------------------------------------------------------------------------------------------------------------------|-----------|----------------------------------------------------------------------------------------------------------------------------------------------------------------------------------------------------------------------------------------------------------------------------------------------|----------------------------------------------------------------------------------------------------------------|-----------------------------------------------------------------------------------------------------------------------|-----|---------------------------------------------------|-------|
|                         |           |                                                                                                                                                                                                                         |           |                                                                                                                                                                                                                                                                                              |                                                                                                                | activity, CU, mental health)                                                                                          |     |                                                   |       |
| Buckner et al., 2020    | USA       | "To pilot test a newly developed PFI for negative affect and cannabis (PFI-NAC) designed to reduce cannabis use, teach quit strategies and other skills to manage cravings, and teach skills to manage negative affect" | Pilot RCT | <b>Brief description:</b><br>Online PFI for negative affect and cannabis (PFI-NAC)<br><b>Name:</b> NR <sup>a</sup>                                                                                                                                                                           | <b>Passive comparator:</b><br>Assessment only <sup>b</sup>                                                     | Adult cannabis users; 18+ years old; who reported past month CU                                                       | 63  | CG = 19.3 (1.0)<br>IG = 18.9 (1.8)                | 84.1% |
| Copeland et al., 2017   | Australia | "To test the short-term effectiveness of brief and extended personalized feedback as part of the online intervention program, <i>Grassessment</i> , in reducing CU and dependence severity"                             | RCT       | <b>Brief description:</b><br>Brief, online self-complete motivational enhancement intervention for cannabis users that provides individualized extended feedback regarding use, motives, and harms<br><b>Name:</b><br><i>Grassessment: Evaluate Your Use of Cannabis</i> + extended feedback | <b>Active comparator:</b><br>Screening + brief PNF (brief feedback version of the <i>Grassessment</i> program) | Adult cannabis users from the general community; 18+ years old; who expressed desire to reduce or quit their cannabis | 287 | Median age (range): 26 (18-65)                    | 38.0% |
| Côté et al., 2018       | Canada    | "To evaluate the efficacy of the Web-based tailored intervention to reduce cannabis use (primary outcome) by bolstering intention (secondary outcome) to abstain from use"                                              | RCT       | <b>Brief description:</b><br>Web-based tailored intervention to reduce CU<br><b>Name:</b> <i>Ma réussite, mon choix</i>                                                                                                                                                                      | <b>Passive comparator:</b><br>Assessment only <sup>b</sup>                                                     | Young people attending adult education centers; 18-24 years old                                                       | 588 | 19.8 (1.9)                                        | 54.3% |
| Cunningham et al., 2021 | Canada    | "To examine the efficacy of a brief, online personalized normative feedback intervention in a large, non-college sample of adults in Canada following national legalization of recreational CU"                         | RCT       | <b>Brief description:</b><br>Brief, online personalized normative feedback intervention for risky CU to motivate change (personalized feedback report + educational materials about risky CU)<br><b>Name:</b> NR <sup>a</sup>                                                                | <b>Active comparator:</b><br>Educational materials about risky CU only                                         | Non-college adults; 18+ years old; with a moderate risk associated with CU (score of 4 or more on the ASSIST)         | 744 | CG = 36.3 (12.6)<br>IG = 35.3 (13.0) <sup>1</sup> | 56.3% |

<sup>1</sup> Mean age for all participants not reported. This study was included in the review based on the mean age of intervention group participants.

|                       |         |                                                                                                                                                                                                                            |     |                                                                                                                                                                                                                                                                                             |                                                                                                           |                                                                                                                                                        |     |              |       |
|-----------------------|---------|----------------------------------------------------------------------------------------------------------------------------------------------------------------------------------------------------------------------------|-----|---------------------------------------------------------------------------------------------------------------------------------------------------------------------------------------------------------------------------------------------------------------------------------------------|-----------------------------------------------------------------------------------------------------------|--------------------------------------------------------------------------------------------------------------------------------------------------------|-----|--------------|-------|
| Elliott et al., 2012  | USA     | “To evaluate the efficacy of the Marijuana eCHECKUP TO GO in correcting descriptive norms, correcting injunctive norms, and preventing initiation of marijuana use in a group of college-age abstainers”                   | RCT | <p><b>Brief description:</b><br/>Brief, norm-correcting, web-based prevention, and intervention program for individuals currently abstaining from marijuana</p> <p><b>Name:</b> The Marijuana eCHECKUP TO GO (e-TOKE) for Universities and Colleges</p>                                     | <p><b>Passive comparator:</b><br/>Assessment only<sup>b</sup></p>                                         | University students; 18+ years old; who did not report past month CU (abstainers)                                                                      | 245 | 20.5 (2.7)   | 73.0% |
| Elliott et al., 2014  | USA     | “To evaluate the short-term effectiveness of eCHECKUP TO GO in changing marijuana involvement and perceived norms in undergraduates”                                                                                       | RCT | <p><b>Brief description:</b><br/>Brief, self-paced, web-based marijuana educational program that incorporates personalized feedback and norm correction</p> <p><b>Name:</b> The Marijuana eCHECKUP TO GO (e-TOKE) for Universities and Colleges</p>                                         | <p><b>Passive comparator:</b><br/>Assessment only<sup>b</sup></p>                                         | College students; who reported past month CU                                                                                                           | 317 | NR           | 52.0% |
| Goodness et al., 2020 | USA     | “To assess the feasibility of implementing and testing the efficacy of a web-based screening and brief intervention to reduce marijuana use and consequences among graduate student presenting to a student health center” | RCT | <p><b>Brief description:</b><br/>Electronic screening and brief intervention to reduce marijuana use and consequences with a booster session (additional feedback on CU at the 3-month timepoint following assessment)</p> <p><b>Name:</b> eCHECKUPTOGO-cannabis + booster intervention</p> | <p><b>Active comparator:</b><br/>Baseline assessment + minimal general health information<sup>c</sup></p> | Graduate/professional students; who reported using cannabis at least monthly over the past 90 days who presented themselves to a student health center | 49  | 25.53 (2.42) | 51.0% |
| Jonas et al., 2018    | Germany | “To examine whether the effectiveness of Quit the Shit (QTS) is reduced by shortening the program or by removing the chat-based counseling option”                                                                         | RCT | <p><b>Brief description:</b><br/>Therapist-guided internet intervention for cannabis users with chat-based</p>                                                                                                                                                                              | <p><b>Active comparators:</b><br/><b>Group 1:</b> QTS version 2 (chat and 28 days)</p>                    | Adult cannabis user; 18+ years old                                                                                                                     | 534 | 27.5 (7.0)   | 34.3% |

|                     |     |                                                                                                                                                                                                                                                                                |           |                                                                                                                                                                                                                                      |                                                                                                            |                                                                                                                                                        |     |                                                                                                                                               |                                                                                                                   |
|---------------------|-----|--------------------------------------------------------------------------------------------------------------------------------------------------------------------------------------------------------------------------------------------------------------------------------|-----------|--------------------------------------------------------------------------------------------------------------------------------------------------------------------------------------------------------------------------------------|------------------------------------------------------------------------------------------------------------|--------------------------------------------------------------------------------------------------------------------------------------------------------|-----|-----------------------------------------------------------------------------------------------------------------------------------------------|-------------------------------------------------------------------------------------------------------------------|
|                     |     |                                                                                                                                                                                                                                                                                |           | (synchronous) and time-lagged (asynchronous) counseling<br><b>Name:</b> Quit the Shit (original version, chat, and 50 days long)                                                                                                     | <b>Group 2:</b> QTS version 3 (no chat and 50 days)<br><b>Group 3:</b> QTS version 4 (no chat and 28 days) |                                                                                                                                                        |     |                                                                                                                                               |                                                                                                                   |
| Lee et al., 2010    | USA | "To evaluate preliminary efficacy of a brief, web-based personalized feedback intervention for marijuana-using students transitioning to college and to examine contemplation for change and family history of drug problems as potential moderators of intervention efficacy" | RCT       | <b>Brief description:</b> Brief, web-based PFI for at-risk marijuana users transitioning to college<br><b>Name:</b> NR <sup>a</sup>                                                                                                  | <b>Passive comparator:</b> Assessment only <sup>b</sup>                                                    | University students; 17-19 years old; who reported past 3-months CU                                                                                    | 341 | 18.03 (0.31)                                                                                                                                  | 54.6%                                                                                                             |
| Palfai et al., 2014 | USA | "To test the feasibility of procedures to screen students for marijuana use in student health services and test the efficacy of a web-based intervention designed to reduce marijuana use and consequences"                                                                    | Pilot RCT | <b>Brief description:</b> Web-based screening and brief intervention for marijuana users<br><b>Name:</b> The Marijuana eCHECKUP TO GO (e-TOKE)                                                                                       | <b>Active comparator:</b> Baseline assessment + feedback on general health-related behaviors <sup>d</sup>  | Undergraduate students presenting to a university health center; who reported using marijuana at least monthly over the past 90 days                   | 123 | Reported by site and intervention condition:<br>On-site: CG = 20.33 (1.27) IG = 19.33 (1.14)<br>Off-site: CG = 19.62 (1.20) IG = 19.35 (1.20) | Reported by site and intervention condition:<br>On-site: CG = 58.0% IG = 56.0%<br>Off-site: CG = 54.0% IG = 62.0% |
| Riggs et al., 2018  | USA | "To pilot-test the efficacy of an adapted personalized feedback + protective behavioural strategies version of Marijuana eCHECKUP TO GO in reducing heavy marijuana use among college students"                                                                                | RCT       | <b>Brief description:</b> Web-based marijuana use intervention providing university-specific personalized feedback with normative information and protective behavioural strategies<br><b>Name:</b> Adapted version of the Marijuana | <b>Active comparator:</b> Healthy stress management <sup>e</sup>                                           | University students; 18+ years old; recreational marijuana users (i.e., nonmedical use); who reported typical marijuana use of at least twice per week | 298 | 19.97 (2.0)                                                                                                                                   | 49.0%                                                                                                             |

| Author(s)                      | Country     | Objective                                                                                                                                                                                                                                       | Design | Intervention                                                                                                                                                                           | Comparator                                                                                                          | Participants                                                                                                                         | Effect Size | Retention                              |       |
|--------------------------------|-------------|-------------------------------------------------------------------------------------------------------------------------------------------------------------------------------------------------------------------------------------------------|--------|----------------------------------------------------------------------------------------------------------------------------------------------------------------------------------------|---------------------------------------------------------------------------------------------------------------------|--------------------------------------------------------------------------------------------------------------------------------------|-------------|----------------------------------------|-------|
| Rooke et al., 2013             | Australia   | "To test the effectiveness of the program in assisting individuals who wished to reduce or stop their cannabis use"                                                                                                                             | RCT    | <b>Brief description:</b> Fully self-guided web-based treatment program for CU and related problems<br><b>Name:</b> Reduce Your Use: How to Break the Cannabis Habit                   | <b>Active comparator:</b> 6 modules of web-based educational information on cannabis                                | Adult cannabis users; 18+ years old; who reported past month CU and who expressed a desire to stop or reduce CU                      | 225         | CG = 30.18 (9.62)<br>IG = 31.88 (9.85) | 38.7% |
| Schaub et al., 2015            | Switzerland | "To investigate and compare the efficacy of web-based self-help interventions—in combination with or without tailored chat counseling based on CBT, MI, and behavioural self-management—in reducing cannabis use in problematic cannabis users" | RCT    | <b>Brief description:</b> Web-based self-help intervention with tailored chat counseling to reduce CU<br><b>Name:</b> CANreduce 1.0                                                    | <b>Active comparator:</b> CANreduce 1.0 without tailored chat counseling<br><b>Passive comparator:</b> Waiting list | Adult cannabis users; 18+ years old; who reported using cannabis at least once a week over the 30 days prior to study entry          | 308         | 29.8 (10.0)                            | 24.7% |
| Sinadinovic et al., 2020       | Sweden      | "To investigate the effects of a web-based treatment program with therapist guidance for adults and adolescents with regular cannabis use from the general population"                                                                          | RCT    | <b>Brief description:</b> Web-based treatment program with therapist guidance designed to help regular cannabis users to reduce or end their CU<br><b>Name:</b> <i>Cannabishjälpen</i> | <b>Passive comparator:</b> Waiting list                                                                             | Adult cannabis users from the general population; 16+ years old; who had used cannabis at least once a week during the last 6 months | 303         | 27.4 (7.2)                             | 32.7% |
| Tossman et al., 2011           | Germany     | "To assess the effectiveness of QTS, with the use frequency and quantity being primary outcomes"                                                                                                                                                | RCT    | <b>Brief description:</b> Web-based counselling program developed to help young people to quit or reduce their CU significantly<br><b>Name:</b> Quit the Shit                          | <b>Passive comparator:</b> Waiting list                                                                             | Adult cannabis users; who expressed the wish to reduce or to cease CU                                                                | 1 292       | 24.7 (6.8)                             | 29.5% |
| Walukevich-Dienst et al., 2019 | USA         | "To test intervention effects (moderated by gender) of an online, university-specific PFI for high-risk cannabis users (i.e., past-month cannabis users with at                                                                                 | RCT    | <b>Brief description:</b> Online PFI for cannabis-using college students with                                                                                                          | <b>Active comparator:</b> PNF only                                                                                  | Undergraduate students; who endorsed past-month CU and who experienced at least                                                      | 204         | 19.83 (1.43)                           | 77.0% |

least one recent cannabis-related problem)<sup>a</sup>

additional information on CU risks  
**Name:** NR<sup>a</sup>

one CU-related problem in the past 3 months

---

ASSIST = Involvement Screening Test; CBT = cognitive behavioural therapy; CG = control group; CU = cannabis use; IG = intervention group; MI = motivational interviewing; NR = not reported; PFI = personalized feedback intervention; PFI-NAC = personalized feedback intervention for negative affect and cannabis; PNF = personalized normative feedback; QTS = 'Quit the Shit'; RCT = randomized controlled trial; SD = standard deviation.

<sup>a</sup> No specific intervention name reported.

<sup>b</sup> Participants were asked to complete baseline and follow-up assessments (or baseline only) and were not given any feedback.

<sup>c</sup> Participants completed a series of questions about CU and other health-related behaviors. Then, they received minimal electronic feedback on recommended hours of sleep, exercise, and diet, based on their baseline responses. No feedback on CU was provided.

<sup>d</sup> Participants were given minimal general health feedback regarding recommended guidelines for sleep, exercise, and nutrition.

<sup>e</sup> Participants were provided with strategies for healthy stress management (e.g., deep breathing, mindfulness, exercise).
