# Supplementary material for: Digital Interventions for Recreational Cannabis Use Among Young Adults: Systematic Review, Meta-Analysis, and Behavior Change Technique Analysis of Randomized Controlled Studies
Source: PubMed Central journal article supplement (PMC11063887; doi:10.2196/55031), 2024-04-17
Supplement: jmir_v26i1e55031_app9.pdf [file jmir_v26i1e55031_app9.pdf]

## Multimedia Appendix 9. Risk-of-bias assessment of each included study for cannabis use and cannabis consequences.

Risk-of-bias assessment of included studies for cannabis consequence outcome ( $n = 10$ ), summarized by risk-of-bias domain

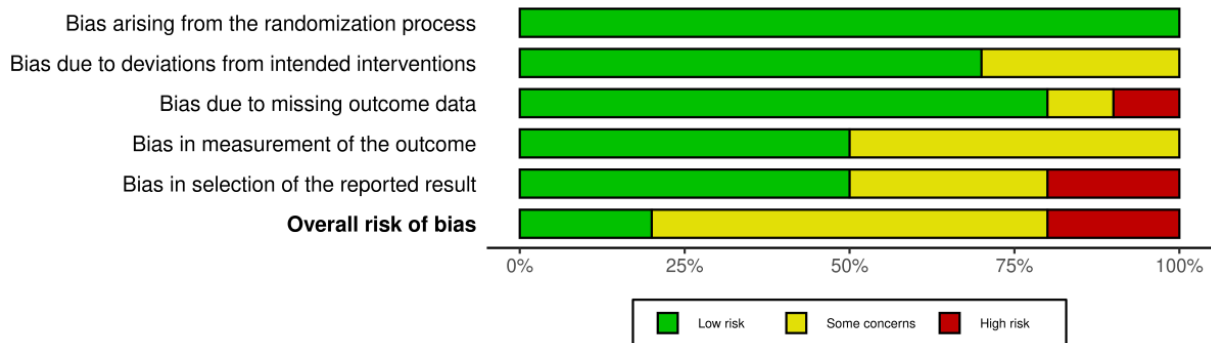

Summary of risk-of-bias assessments of each included study for cannabis consequence outcome ( $n = 10$ ) at the outcome level, for each risk-of-bias domain

| Study                           | Risk of bias domains |    |    |    |    | Overall |
|---------------------------------|----------------------|----|----|----|----|---------|
|                                 | D1                   | D2 | D3 | D4 | D5 |         |
| Bonar et al (2023)b             | +                    | -  | +  | +  | +  | -       |
| Buckner et al (2019)b           | +                    | -  | X  | -  | X  | X       |
| Cunningham et al (2021)b        | +                    | +  | +  | +  | +  | +       |
| Elliott et al (2014)b           | +                    | -  | +  | -  | X  | X       |
| Goodness and Palfai (2020)b     | +                    | +  | -  | -  | +  | -       |
| Lee et al (2010)b               | +                    | +  | +  | -  | -  | -       |
| Palfai et al (2014)b            | +                    | +  | +  | +  | +  | +       |
| Riggs et al (2018)b             | +                    | +  | +  | +  | -  | -       |
| Sinadinovic et al (2020)b       | +                    | +  | +  | -  | +  | -       |
| Walukevich-Dienst et al (2019)b | +                    | +  | +  | +  | -  | -       |

Domains:  
D1: Bias arising from the randomization process.  
D2: Bias due to deviations from intended intervention.  
D3: Bias due to missing outcome data.  
D4: Bias in measurement of the outcome.  
D5: Bias in selection of the reported result.

Judgement  
X High  
- Some concerns  
+ Low

Risk-of-bias assessment of included studies for cannabis use outcome (N = 19), summarized by risk-of-bias domain

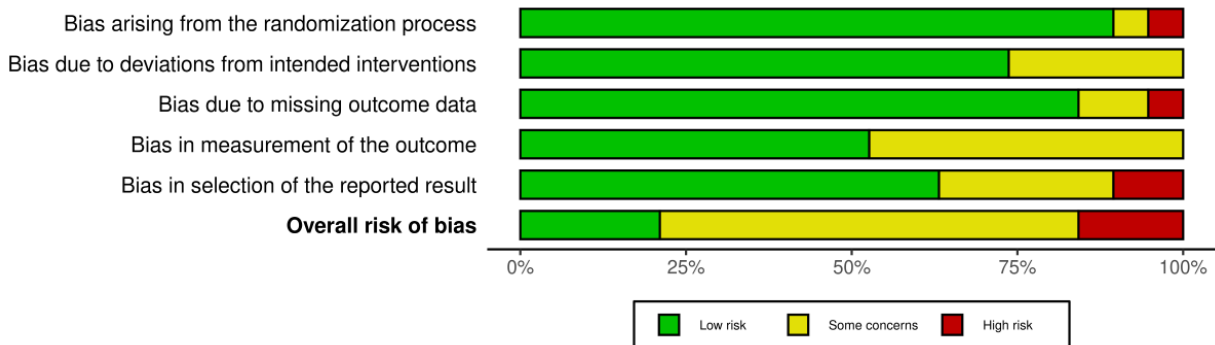

Summary of risk-of-bias assessments of each included study for cannabis use outcome (N= 19) at the outcome level, for each risk-of-bias domain

| Study                           | Risk of bias domains |    |    |    |    | Overall |
|---------------------------------|----------------------|----|----|----|----|---------|
|                                 | D1                   | D2 | D3 | D4 | D5 |         |
| Baumgartner et al (2021)        | +                    | +  | +  | +  | +  | -       |
| Bonar et al (2022)              | +                    | -  | +  | +  | +  | -       |
| Bonar et al (2023)a             | +                    | -  | +  | +  | +  | -       |
| Buckner et al (2019)a           | +                    | -  | ✗  | -  | ✗  | ✗       |
| Copeland et al (2017)           | +                    | -  | +  | +  | -  | -       |
| Côté et al (2018)               | +                    | +  | +  | -  | +  | -       |
| Cunningham et al (2021)a        | +                    | +  | +  | +  | +  | +       |
| Elliott et al (2012)            | +                    | +  | -  | -  | +  | -       |
| Elliott et al (2014)a           | +                    | -  | +  | -  | ✗  | ✗       |
| Goodness and Palfai (2020)a     | +                    | +  | -  | -  | +  | -       |
| Jonas et al (2018)              | +                    | +  | +  | +  | +  | +       |
| Lee et al (2010)a               | +                    | +  | +  | -  | -  | -       |
| Palfai et al (2014)a            | +                    | +  | +  | +  | +  | +       |
| Riggs et al (2018)a             | +                    | +  | +  | +  | -  | -       |
| Rooke et al(2013)               | +                    | +  | +  | +  | +  | +       |
| Schaub et al (2015)             | ✗                    | +  | +  | -  | +  | ✗       |
| Sinadinovic et al (2020)a       | +                    | +  | +  | -  | +  | -       |
| Tossmann et al (2011)           | +                    | +  | +  | -  | -  | -       |
| Walukevich-Dienst et al (2019)a | +                    | +  | +  | +  | -  | -       |

Domains:  
D1: Bias arising from the randomization process.  
D2: Bias due to deviations from intended intervention.  
D3: Bias due to missing outcome data.  
D4: Bias in measurement of the outcome.  
D5: Bias in selection of the reported result.

Judgement  
✗ High  
- Some concerns  
+ Low
