# Supplementary material for: Digital Interventions for Recreational Cannabis Use Among Young Adults: Systematic Review, Meta-Analysis, and Behavior Change Technique Analysis of Randomized Controlled Studies
Source: PubMed Central journal article supplement (PMC11063887; doi:10.2196/55031), 2024-04-17
Supplement: jmir_v26i1e55031_app11.pdf [file jmir_v26i1e55031_app11.pdf]

Multimedia Appendix 11. Summary of evidence according to the Grading of Recommendations Assessment, Development, and Evaluation tool.

| Certainty assessment |              |              |               |              |             |                      | No of patients |         | Effect            | Certainty | Importance |
|----------------------|--------------|--------------|---------------|--------------|-------------|----------------------|----------------|---------|-------------------|-----------|------------|
| No of studies        | Study design | Risk of bias | Inconsistency | Indirectness | Imprecision | Other considerations | Intervention   | Control | Absolute (95% CI) |           |            |

**Cannabis use**

|   |                   |                      |             |             |             |      |      |     |                                                                               |                  |          |
|---|-------------------|----------------------|-------------|-------------|-------------|------|------|-----|-------------------------------------------------------------------------------|------------------|----------|
| 3 | Randomised trials | Serious <sup>a</sup> | Not serious | Not serious | Not serious | None | 1368 | 729 | SMD<br><b>6.79</b><br>SD<br><b>lower</b><br>(9.59<br>lower<br>to 4<br>higher) | ⊕⊕⊕○<br>Moderate | CRITICAL |
|---|-------------------|----------------------|-------------|-------------|-------------|------|------|-----|-------------------------------------------------------------------------------|------------------|----------|

**CI:** Confidence Interval; **SMD:** Standardised Mean Difference

*Explanations*

a. Baumgartner (2021): Significant differences between groups at baseline might suggest a problem with the randomization process. Tossmann (2011): Outcomes assessors were probably aware of the intervention assignment + No pre-specified analysis plan.
